# Supplementary material
Source: PubMed Central journal article supplement (PMC3177856)
Supplement: NIHMS117153-supplement-1_si_001.pdf [file NIHMS117153-supplement-1_si_001.pdf]

## **SUPPLEMENTAL INFORMATION:**

**Supplemental Table 1:** A list of unique peptides with the percent sequence coverage using a MALDI 4700 TOF/TOF mass spectrometer. The peptides identified for heart and liver mitochondria correspond to Figure 1. Additionally, a list of references for each previously identified phosphoprotein is included.

**Supplemental Table 2:** A list of single-peptide based protein identifications with Mascot scores and E-values for each single-peptide.

**Supplemental Figure 1:** Single-peptide MS/MS labeled fragmentation patterns for the identifications in Supplemental Table 2. Panel A corresponds to the spectra for protein #23, Panel B to protein #41, Panel C to protein #46, Panel D to protein #52, Panel E to protein #59, Panel F to protein #62, and Panel G to protein #63, in Figure 1.

# Supplemental Table 1

Supplemental Table 1. Sequence coverage of Phos-Tag stained protein from heart and liver mitochondria, corresponding to Figure 1.

| Functional Category              | Spot #                                                              | Protein Name                                                                             | NCBI Accession Number                                      | Unique MS/MS Peptides (%coverage) Heart | Unique MS/MS Peptides (%coverage) Liver |
|----------------------------------|---------------------------------------------------------------------|------------------------------------------------------------------------------------------|------------------------------------------------------------|-----------------------------------------|-----------------------------------------|
| <b>OXIDATIVE PHOSPHORYLATION</b> |                                                                     |                                                                                          |                                                            |                                         |                                         |
| Complex I                        | 2                                                                   | NADH dehydrogenase (ubiquinone) Fe-S protein 1 (75kDa) [11]                              | 51858651                                                   | 9 (15%)                                 |                                         |
|                                  | 13                                                                  | NADH dehydrogenase (ubiquinone) Fe-S protein 2 (49kDa) [19]                              | 116242673                                                  | 9 (23%)                                 |                                         |
|                                  | 17                                                                  | NADH dehydrogenase (ubiquinone) 1 $\alpha$ subcomplex 10 (42kDa) [16,17,22]              | 464254                                                     | 4 (10%)                                 |                                         |
|                                  | 32                                                                  | NADH dehydrogenase (ubiquinone) Fe-S protein 3 (30kDa)                                   | 6166589                                                    | 10 (21%)                                | 4 (18%)                                 |
|                                  | 37                                                                  | NADH dehydrogenase (ubiquinone) flavoprotein 2, mitochondrial precursor                  | 128865                                                     | 5 (22%)                                 |                                         |
|                                  | 35                                                                  | NADH dehydrogenase (ubiquinone) Fe-S protein 8 (23kDa) [3]                               | 62267022                                                   | 6 (27%)                                 |                                         |
|                                  | 44                                                                  | NADH dehydrogenase (ubiquinone) iron-sulfur protein 5 (15kDa)                            | 3914138                                                    | 2 (17%)                                 |                                         |
|                                  | 5                                                                   | Succinate dehydrogenase [ubiquinone] flavoprotein subunit, mitochondrial precursor [21]  | 75070503                                                   | 7 (16%)                                 | 7 (16%)                                 |
|                                  | 61                                                                  | Succinate dehydrogenase [ubiquinone] iron-sulfur subunit, mitochondrial precursor        | 20455488                                                   |                                         | 4 (16%)                                 |
|                                  | 10                                                                  | Ubiquinol-cytochrome c reductase complex core protein I, mitochondrial precursor [19,24] | 10720406                                                   | 4 (15%)                                 | 2 (6%)                                  |
| Complex III                      | 33                                                                  | Ubiquinol-cytochrome c reductase, Rieske iron-sulfur protein precursor [19]              | 52001457                                                   | 5 (18%)                                 |                                         |
|                                  | 45                                                                  | Ubiquinol-cytochrome c reductase complex, 14 kDa protein                                 | 136717                                                     | 4 (44%)                                 |                                         |
|                                  | 41                                                                  | Cytochrome b-c1 Complex, subunit 6 [15]                                                  | 109940045                                                  | 1 (7%)                                  |                                         |
| Complex IV                       | 42                                                                  | Cytochrome c oxidase polypeptide Va, mitochondrial precursor [9]                         | 117099                                                     | 2 (17%)                                 | 2 (17%)                                 |
|                                  | 43                                                                  | Cytochrome c oxidase polypeptide Vb, mitochondrial precursor [6]                         | 75042739                                                   | 5 (32%)                                 |                                         |
| Complex V (FoF1-ATPase)          | 8                                                                   | ATP synthase, mitochondrial F1 complex, $\alpha$ subunit [18,24]                         | 15030240                                                   | 18 (41%)                                | 13 (32%)                                |
|                                  | 9                                                                   | ATP synthase, mitochondrial F1 complex, $\beta$ subunit [12,18]                          | 32189394                                                   | 15 (35%)                                | 15 (37%)                                |
|                                  | 38                                                                  | ATP synthase d-chain, mitochondrial precursor                                            | 114686                                                     | 2 (19%)                                 | 2 (19%)                                 |
|                                  | 31                                                                  | ATP synthase $\gamma$ -chain, mitochondrial precursor [4,18,24]                          | 543874                                                     | 2 (14%)                                 |                                         |
| 40                               | ATP synthase, oligomycin sensitivity-conferring protein [19]        | 143811365                                                                                | 3 (9%)                                                     |                                         |                                         |
| <b>INTERMEDIARY METABOLISM</b>   |                                                                     |                                                                                          |                                                            |                                         |                                         |
| Krebs Cycle                      | 1                                                                   | Aconitase hydratase, mitochondrial precursor [7,18,21]                                   | 113159                                                     | 18 (32%)                                |                                         |
|                                  | 21                                                                  | Citrate synthase, mitochondrial precursor [19]                                           | 116470                                                     | 6 (14%)                                 |                                         |
|                                  | 12                                                                  | **Pyruvate dehydrogenase complex, E1 $\alpha$ subunit [7,18,19,24]                       | 448580                                                     | 8 (24%)                                 | 5 (10%)                                 |
|                                  | 26                                                                  | Pyruvate dehydrogenase complex, E1 $\beta$ subunit                                       | 116242689                                                  | 5 (18%)                                 |                                         |
|                                  | 4                                                                   | Pyruvate dehydrogenase complex, E2 subunit                                               | 3915777                                                    | 3 (7%)                                  |                                         |
|                                  | 46                                                                  | Phosphoenolpyruvate carboxykinase (GTP), mitochondrial precursor [24]                    | 52783203                                                   |                                         | 1 (1%)                                  |
|                                  | 23                                                                  | Isocitrate dehydrogenase (NADP-dependent) [8,19]                                         | 462384                                                     | 13 (32%)                                | 1 (1%)                                  |
|                                  | 15                                                                  | Isocitrate dehydrogenase (NAD) subunit alpha, mitochondrial precursor                    | 68565369                                                   | 9 (29%)                                 |                                         |
|                                  | 27                                                                  | Malate dehydrogenase, mitochondrial precursor [7,18,20]                                  | 2506849                                                    | 14 (52%)                                | 11 (44%)                                |
|                                  | 16                                                                  | Branched-chain alpha-keto acid dehydrogenase E1 component $\alpha$ chain [12,18]         | 129030                                                     | 5 (16%)                                 |                                         |
|                                  | 25                                                                  | Succinyl-CoA ligase (GDP-forming) alpha-chain, mitochondrial precursor [18]              | 8134728                                                    | 5 (24%)                                 |                                         |
|                                  | 53                                                                  | Succinyl-CoA ligase (GDP-forming) beta-chain, mitochondrial precursor                    | 21264506                                                   |                                         | 7 (17%)                                 |
|                                  | 14                                                                  | Succinyl-CoA ligase (ADP-forming) beta-chain, mitochondrial precursor [7,24]             | 21263966                                                   | 9 (23%)                                 |                                         |
|                                  | 11                                                                  | Dihydropyridine succinyltransferase, 2-oxoglutarate dehydrogenase complex                | 18203301                                                   | 10 (22%)                                |                                         |
|                                  | Cysteine Metabolism                                                 | 24                                                                                       | Aspartate aminotransferase, mitochondrial precursor [8,19] | 112985                                  | 9 (31%)                                 |
| 57                               |                                                                     | Thiosulfate sulfurtransferase, mitochondrial precursor [3]                               | 1174694                                                    |                                         | 6 (19%)                                 |
| Fatty Acid Oxidation             | 52                                                                  | Trifunctional enzyme subunit beta, mitochondrial precursor [23]                          | 6015048                                                    |                                         | 1 (1%)                                  |
|                                  | 67                                                                  | Trifunctional enzyme subunit alpha, mitochondrial precursor                              | 7387634                                                    |                                         | 5 (10%)                                 |
|                                  | 54                                                                  | Short-branched chain specific acyl-CoA dehydrogenase (SBCAD) [19]                        | 75060971                                                   |                                         | 2 (4%)                                  |
|                                  | 20                                                                  | Long-chain specific acyl-CoA dehydrogenase (LCAD) [24]                                   | 2829676                                                    | 11 (32%)                                | 12 (34%)                                |
|                                  | 55                                                                  | Medium-chain specific acyl-CoA dehydrogenase (MCAD)                                      | 148872486                                                  |                                         | 6 (20%)                                 |
|                                  | 19                                                                  | Short-chain specific acyl-CoA dehydrogenase (SCAD)                                       | 13878316                                                   | 6 (16%)                                 | 3 (10%)                                 |
|                                  | 60                                                                  | Short chain enoyl-CoA hydratase                                                          | 119119                                                     |                                         | 1 (4%)                                  |
|                                  | 59                                                                  | 2,4-dienoyl-CoA reductase, mitochondrial precursor [19]                                  | 3913456                                                    |                                         | 1 (2%)                                  |
|                                  | 62                                                                  | 3-hydroxyacyl-CoA dehydrogenase type-2                                                   | 3183024                                                    |                                         | 2 (11%)                                 |
|                                  | 58                                                                  | D-beta-hydroxybutyrate dehydrogenase, mitochondrial precursor                            | 25108876                                                   |                                         | 2 (5%)                                  |
| Urea Cycle                       | 56                                                                  | Ornithine carbamoyltransferase, mitochondrial precursor                                  | 3183093                                                    |                                         | 5 (14%)                                 |
|                                  | 65                                                                  | Carbamoyl-phosphate synthase I, mitochondrial precursor [24]                             | 117492                                                     |                                         |                                         |
| Amino Acid Metabolism            | 34                                                                  | Electron transfer flavoprotein, $\beta$ subunit [24]                                     | 75053043                                                   | 8 (38%)                                 | 21 (18%)                                |
|                                  | 49                                                                  | Glutamate dehydrogenase 1, mitochondrial precursor [24]                                  | 118541                                                     |                                         | 13 (29%)                                |
|                                  | 68                                                                  | 3-hydroxyisobutyrate dehydrogenase, mitochondrial precursor                              | 122135732                                                  |                                         | 3 (13%)                                 |
| <b>ANTIOXIDANT</b>               |                                                                     |                                                                                          |                                                            |                                         |                                         |
|                                  | 39                                                                  | Mn superoxide dismutase [18,24]                                                          | 134677                                                     | 4 (21%)                                 | 4 (21%)                                 |
|                                  | 36                                                                  | Thioredoxin-dependent peroxide reductase, mitochondrial precursor                        | 2507170                                                    | 4 (17%)                                 | 3 (14%)                                 |
| <b>TRANSPORT</b>                 |                                                                     |                                                                                          |                                                            |                                         |                                         |
|                                  | 30                                                                  | Voltage-dependent anion channel 1 [1,5,8,12,13,14,18,19,25,26]                           | 10720225                                                   | 8 (37%)                                 |                                         |
|                                  | 29                                                                  | Voltage-dependent anion channel 2 [5,18]                                                 | 75050405                                                   | 6 (26%)                                 |                                         |
|                                  | 63                                                                  | Mitochondrial import inner membrane translocase, subunit Tim8A [24]                      | 90101777                                                   |                                         | 1 (11%)                                 |
| OTHER                            | 6                                                                   | 60 kDa heat shock protein, mitochondrial precursor [2,3,8,18,19,20,24]                   | 51702252                                                   | 12 (23%)                                | 13(30%)                                 |
|                                  | 3                                                                   | 70kDa heat shock protein, mitochondrial precursor [10,18,19]                             | 14917005                                                   | 13 (23%)                                | 12 (25%)                                |
|                                  | 64                                                                  | 10 kDa heat shock protein, mitochondrial [8,19]                                          | 47606335                                                   |                                         | 2 (18%)                                 |
|                                  | 22                                                                  | Creatine kinase, sarcomeric mitochondrial precursor                                      | 68052065                                                   | 10 (28%)                                |                                         |
|                                  | 51                                                                  | Glycine amidinotransferase [24]                                                          | 1730202                                                    |                                         | 4 (8%)                                  |
|                                  | 28                                                                  | Prohibitin [19]                                                                          | 464371                                                     | 11 (49%)                                | 10 (51%)                                |
|                                  | 47                                                                  | Aldehyde dehydrogenase class 2, mitochondrial precursor [19]                             | 118502                                                     |                                         | 9 (37%)                                 |
|                                  | 48                                                                  | Aldehyde dehydrogenase family 7, member A1 [18]                                          | 109940193                                                  |                                         | 9 (25%)                                 |
|                                  | 50                                                                  | Serine hydroxymethyltransferase, mitochondrial precursor                                 | 6226865                                                    |                                         | 4 (9%)                                  |
|                                  | 18                                                                  | Elongation factor Tu, mitochondrial precursor                                            | 1352352                                                    | 10 (26%)                                |                                         |
| 7                                | Dihydropolyl dehydrogenase, mitochondrial precursor                 | 118675                                                                                   | 10 (24%)                                                   |                                         |                                         |
| 66                               | Propionyl-CoA carboxylase alpha chain, mitochondrial precursor [24] | 6174892                                                                                  |                                                            | 6 (11%)                                 |                                         |

## Supplemental Table 1 Reference List

1. Beausoleil, S. A.; Jedrychowski, M.; Schwartz, D.; Elias, J. E.; Villen, J.; Li, J.; Cohn, M. A.; Cantley, L. C.; Gygi, S. P. Large-scale characterization of HeLa cell nuclear phosphoproteins. *Proc. Natl. Acad. Sci. U. S. A* **2004**, *101* (33), 12130-12135.
2. Beausoleil, S. A.; Villen, J.; Gerber, S. A.; Rush, J.; Gygi, S. P. A probability-based approach for high-throughput protein phosphorylation analysis and site localization. *Nat. Biotechnol.* **2006**, *24* (10), 1285-1292.
3. Dai, J.; Jin, W. H.; Sheng, Q. H.; Shieh, C. H.; Wu, J. R.; Zeng, R. Protein phosphorylation and expression profiling by Yin-yang multidimensional liquid chromatography (Yin-yang MDLC) mass spectrometry. *J. Proteome. Res.* **2007**, *6* (1), 250-262.
4. Di, P. F.; Bisetto, E.; Alverdi, V.; Mavelli, I.; Esposito, G.; Lippe, G. Differential steady-state tyrosine phosphorylation of two oligomeric forms of mitochondrial F<sub>0</sub>F<sub>1</sub>ATP synthase: a structural proteomic analysis. *Proteomics.* **2006**, *6* (3), 921-926.
5. Distler, A. M.; Kerner, J.; Hoppel, C. L. Post-translational modifications of rat liver mitochondrial outer membrane proteins identified by mass spectrometry. *Biochim. Biophys. Acta* **2007**, *1774* (5), 628-636.
6. Fang, J. K.; Prabu, S. K.; Sepuri, N. B.; Raza, H.; Anandatheerthavarada, H. K.; Galati, D.; Spear, J.; Avadhani, N. G. Site specific phosphorylation of cytochrome c oxidase subunits I, IVi1 and Vb in rabbit hearts subjected to ischemia/reperfusion. *FEBS Lett.* **2007**, *581* (7), 1302-1310.
7. Feng, J.; Zhu, M.; Schaub, M. C.; Gehrig, P.; Roschitzki, B.; Lucchinetti, E.; Zaugg, M. Phosphoproteome analysis of isoflurane-protected heart mitochondria: phosphorylation of adenine nucleotide translocator-1 on Tyr194 regulates mitochondrial function. *Cardiovasc. Res.* **2008**, *80* (1), 20-29.
8. Guo, A.; Villen, J.; Kornhauser, J.; Lee, K. A.; Stokes, M. P.; Rikova, K.; Possemato, A.; Nardone, J.; Innocenti, G.; Wetzel, R.; Wang, Y.; MacNeill, J.; Mitchell, J.; Gygi, S. P.; Rush, J.; Polakiewicz, R. D.; Comb, M. J. Signaling networks assembled by oncogenic EGFR and c-Met. *Proc. Natl. Acad. Sci. U. S. A* **2008**, *105* (2), 692-697.
9. Helling, S.; Vogt, S.; Rhiel, A.; Ramzan, R.; Wen, L.; Marcus, K.; Kadenbach, B. Phosphorylation and kinetics of mammalian cytochrome c oxidase. *Mol. Cell Proteomics.* **2008**, *7* (9), 1714-1724.
10. Kanai, M.; Ma, Z.; Izumi, H.; Kim, S. H.; Mattison, C. P.; Winey, M.; Fukasawa, K. Physical and functional interaction between mortalin and Mps1 kinase. *Genes Cells* **2007**, *12* (6), 797-810.

11. Kim, S. C.; Chen, Y.; Mirza, S.; Xu, Y.; Lee, J.; Liu, P.; Zhao, Y. A clean, more efficient method for in-solution digestion of protein mixtures without detergent or urea. *J. Proteome. Res.* **2006**, *5* (12), 3446-3452.
12. Lee, J.; Xu, Y.; Chen, Y.; Sprung, R.; Kim, S. C.; Xie, S.; Zhao, Y. Mitochondrial phosphoproteome revealed by an improved IMAC method and MS/MS/MS. *Mol. Cell Proteomics.* **2007**, *6* (4), 669-676.
13. Munton, R. P.; Tweedie-Cullen, R.; Livingstone-Zatchej, M.; Weinandy, F.; Waidelich, M.; Longo, D.; Gehrig, P.; Potthast, F.; Rutishauser, D.; Gerrits, B.; Panse, C.; Schlapbach, R.; Mansuy, I. M. Qualitative and quantitative analyses of protein phosphorylation in naive and stimulated mouse synaptosomal preparations. *Mol. Cell Proteomics.* **2007**, *6* (2), 283-293.
14. Nousiainen, M.; Sillje, H. H.; Sauer, G.; Nigg, E. A.; Korner, R. Phosphoproteome analysis of the human mitotic spindle. *Proc. Natl. Acad. Sci. U. S. A* **2006**, *103* (14), 5391-5396.
15. Olsen, J. V.; Blagoev, B.; Gnadt, F.; Macek, B.; Kumar, C.; Mortensen, P.; Mann, M. Global, in vivo, and site-specific phosphorylation dynamics in signaling networks. *Cell* **2006**, *127* (3), 635-648.
16. Palmisano, G.; Sardanelli, A. M.; Signorile, A.; Papa, S.; Larsen, M. R. The phosphorylation pattern of bovine heart complex I subunits. *Proteomics.* **2007**, *7* (10), 1575-1583.
17. Pocsfalvi, G.; Cuccurullo, M.; Schlosser, G.; Scacco, S.; Papa, S.; Malorni, A. Phosphorylation of B14.5a subunit from bovine heart complex I identified by titanium dioxide selective enrichment and shotgun proteomics. *Mol. Cell Proteomics.* **2007**, *6* (2), 231-237.
18. Reinders, J.; Wagner, K.; Zahedi, R. P.; Stojanovski, D.; Eyrich, B.; van der Laan, M.; Rehling, P.; Sickmann, A.; Pfanner, N.; Meisinger, C. Profiling phosphoproteins of yeast mitochondria reveals a role of phosphorylation in assembly of the ATP synthase. *Mol. Cell Proteomics.* **2007**, *6* (11), 1896-1906.
19. Rikova, K.; Guo, A.; Zeng, Q.; Possemato, A.; Yu, J.; Haack, H.; Nardone, J.; Lee, K.; Reeves, C.; Li, Y.; Hu, Y.; Tan, Z.; Stokes, M.; Sullivan, L.; Mitchell, J.; Wetzel, R.; MacNeill, J.; Ren, J. M.; Yuan, J.; Bakalarski, C. E.; Villen, J.; Kornhauser, J. M.; Smith, B.; Li, D.; Zhou, X.; Gygi, S. P.; Gu, T. L.; Polakiewicz, R. D.; Rush, J.; Comb, M. J. Global survey of phosphotyrosine signaling identifies oncogenic kinases in lung cancer. *Cell* **2007**, *131* (6), 1190-1203.
20. Rush, J.; Moritz, A.; Lee, K. A.; Guo, A.; Goss, V. L.; Spek, E. J.; Zhang, H.; Zha, X. M.; Polakiewicz, R. D.; Comb, M. J. Immunoaffinity profiling of tyrosine phosphorylation in cancer cells. *Nat. Biotechnol.* **2005**, *23* (1), 94-101.
21. Salvi, M.; Morrice, N. A.; Brunati, A. M.; Toninello, A. Identification of the flavoprotein of succinate dehydrogenase and aconitase as in vitro

mitochondrial substrates of Fgr tyrosine kinase. *FEBS Lett.* **2007**, *581* (29), 5579-5585.

22. Schilling, B.; Aggeler, R.; Schulenberg, B.; Murray, J.; Row, R. H.; Capaldi, R. A.; Gibson, B. W. Mass spectrometric identification of a novel phosphorylation site in subunit NDUFA10 of bovine mitochondrial complex I. *FEBS Lett.* **2005**, *579* (11), 2485-2490.
23. Trinidad, J. C.; Thalhammer, A.; Specht, C. G.; Lynn, A. J.; Baker, P. R.; Schoepfer, R.; Burlingame, A. L. Quantitative analysis of synaptic phosphorylation and protein expression. *Mol. Cell Proteomics.* **2008**, *7* (4), 684-696.
24. Villen, J.; Beausoleil, S. A.; Gerber, S. A.; Gygi, S. P. Large-scale phosphorylation analysis of mouse liver. *Proc. Natl. Acad. Sci. U. S. A* **2007**, *104* (5), 1488-1493.
25. Yuan, S.; Fu, Y.; Wang, X.; Shi, H.; Huang, Y.; Song, X.; Li, L.; Song, N.; Luo, Y. Voltage-dependent anion channel 1 is involved in endostatin-induced endothelial cell apoptosis. *FASEB J.* **2008**, *22* (8), 2809-2820.
26. Zahedi, R. P.; Lewandrowski, U.; Wiesner, J.; Wortelkamp, S.; Moebius, J.; Schutz, C.; Walter, U.; Gambaryan, S.; Sickmann, A. Phosphoproteome of resting human platelets. *J. Proteome. Res.* **2008**, *7* (2), 526-534.

## Supplemental Table 2:

Supplemental Table 2. Single-peptide-based protein identifications using 4700 MALDI TOF/TOF mass spectrometer.

| Spot # | Protein Name                                                     | NCBI Accession Number | Peptide sequence | Precursor m/z (+1) | Mascot score | Mascot E-value |
|--------|------------------------------------------------------------------|-----------------------|------------------|--------------------|--------------|----------------|
| 40     | Cytochrome b-c1 complex subunit 6                                | 109940045             | LELCDKR          | 933.44             | 25           | 0.49           |
| 45     | Phosphoenolpyruvate carboxykinase (GTP), mitochondrial precursor | 52783203              | EVLAELEALEGR     | 1328.71            | 46           | 0.0025         |
| 22     | Isocitrate dehydrogenase (NADP-dependent)                        | 462384                | YFDLGLPNR        | 1094.56            | 48           | 0.0017         |
| 52     | Trifunctional enzyme subunit beta, mitochondrial precursor       | 6015048               | NIVVVDGVR        | 970.56             | 37           | 0.024          |
| 61     | Short chain enoyl-CoA hydratase                                  | 119119                | NSSVGLIQLNRPK    | 1425.81            | 48           | 0.0016         |
| 60     | 2,4-dienoyl-CoA reductase, mitochondrial precursor               | 3913456               | FNVIQPGPIK       | 1112.64            | 47           | 0.0021         |
| 64     | Mitochondrial import inner membrane translocase, subunit Tim8A   | 90101777              | FIDTSQFILNR      | 1353.69            | 28           | 0.16           |

Supplemental Figure 1:

MS/MS Fragmentation of **YFDLGLPNR**  
Isocitrate dehydrogenase [NADP], mitochondrial precursor (EC 1.1.1.42)

A

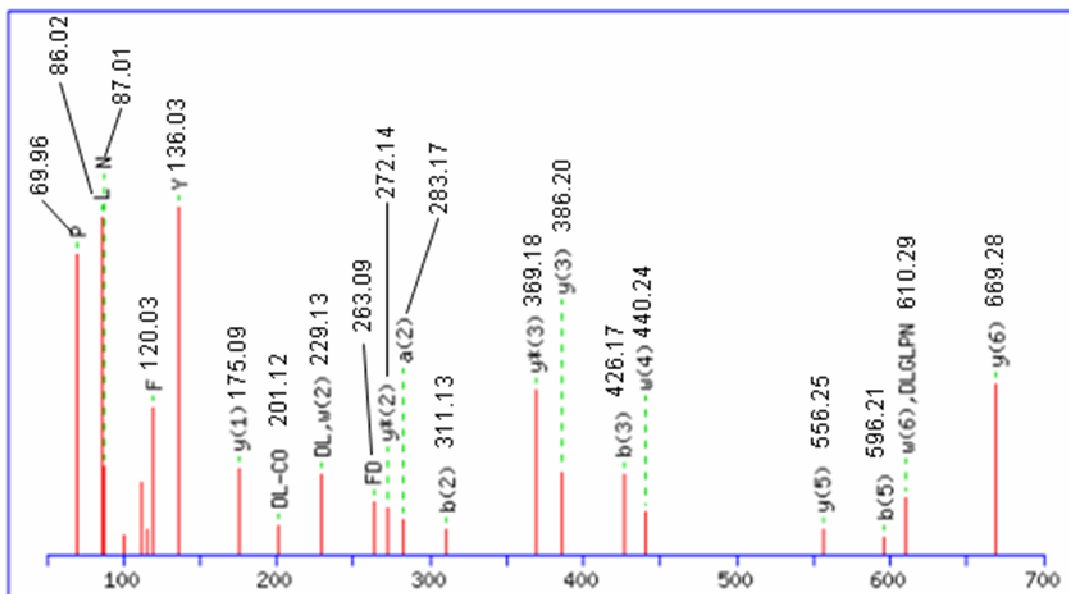

**Monoisotopic mass of neutral peptide Mr(calc):** 1093.5556

**Fixed modifications:** Carbamidomethyl (C)

**Ions Score:** 48 **Expect:** 0.0017

**Matches (Bold Red):** 24/110 fragment ions using 20 most intense peaks

MS/MS Fragmentation of **LELCDKR**  
Cytochrome b-c1 complex subunit 6, mitochondrial precursor

**D**

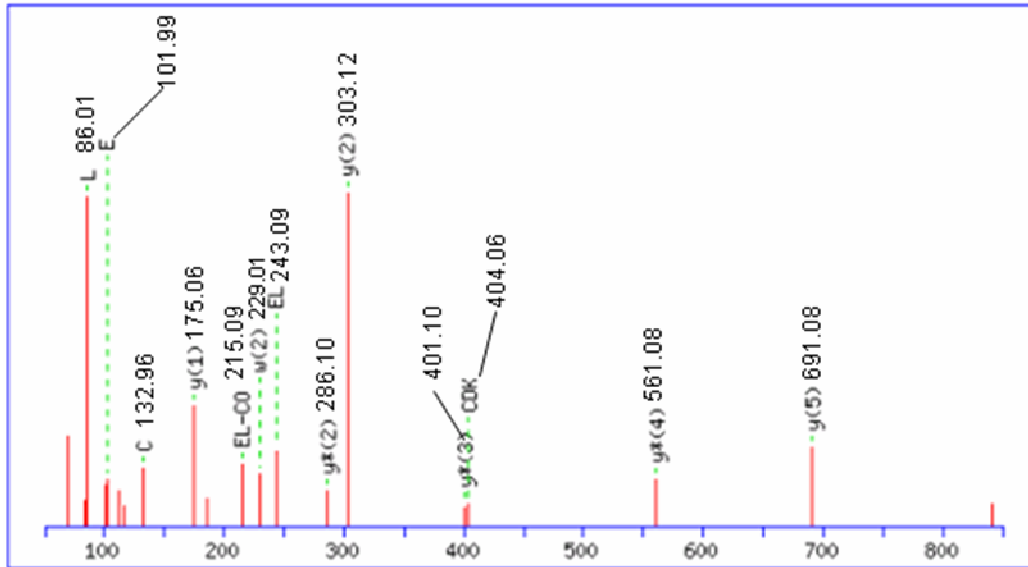

**Monoisotopic mass of neutral peptide Mr(calc):** 932.4749

**Fixed modifications:** Carbamidomethyl (C)

**Ions Score:** 25 **Expect:** 0.49

**Matches (Bold Red):** 17/79 fragment ions using 15 most intense peaks



MS/MS Fragmentation of **EVLAELEALEGR**  
 Phosphoenolpyruvate carboxykinase [GIP], mitochondrial precursor

C

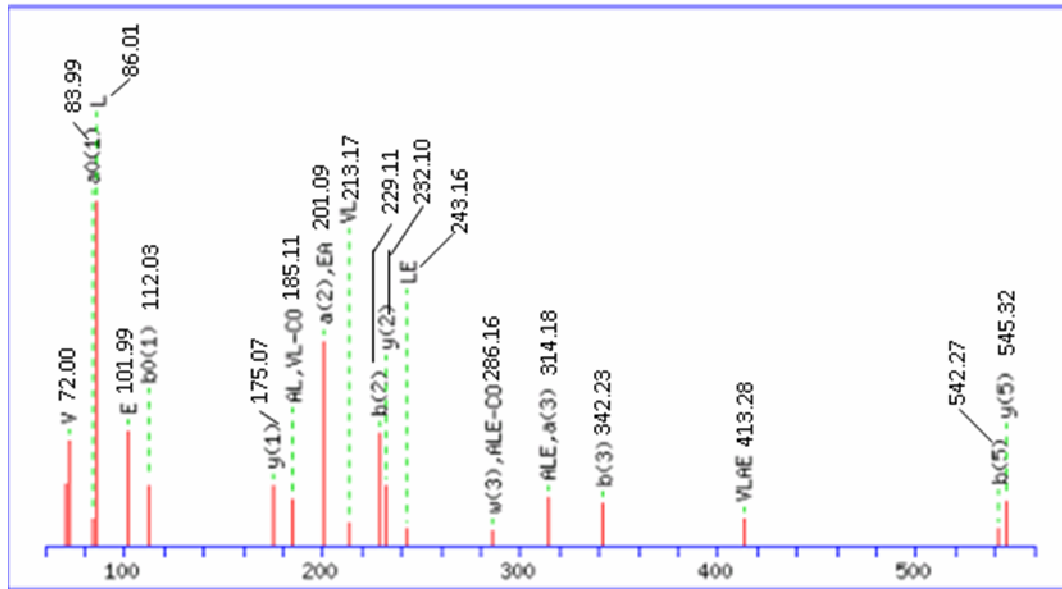

**Monoisotopic mass of neutral peptide Mr(calc): 1327.6983**

**Fixed modifications:** Carbamidomethyl (C)

**Ions Score:** 46 **Expect:** 0.0025

**Matches (Bold Red):** 41/176 fragment ions using 19 most intense peaks

MS/MS Fragmentation of **NIVVVDGVR**  
Trifunctional enzyme subunit beta, mitochondrial precursor (TP-beta)

D

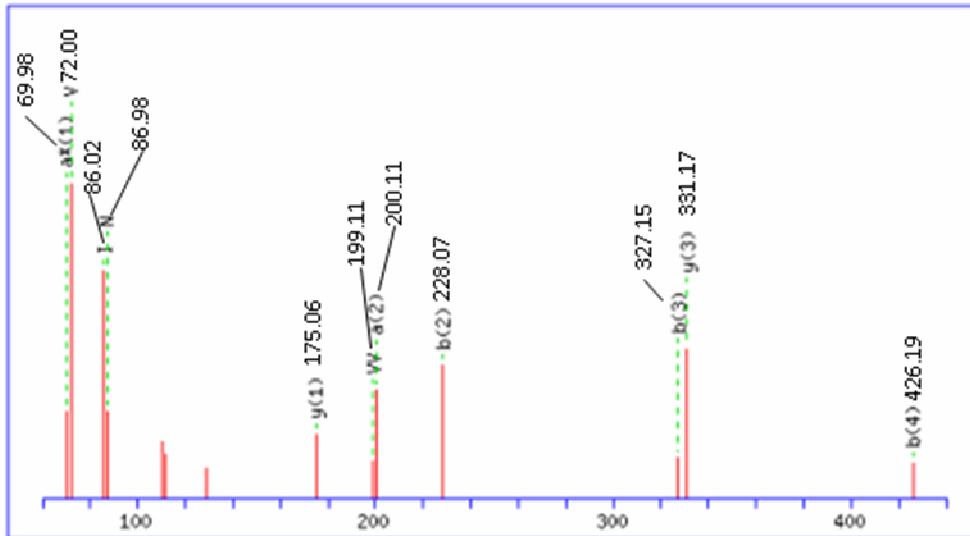

**Monoisotopic mass of neutral peptide Mr(calc):** 969.5607

**Fixed modifications:** Carbamidomethyl (C)

**Ions Score:** 37 **Expect:** 0.024

**Matches (Bold Red):** 16/125 fragment ions using 11 most intense peaks

MS/MS Fragmentation of **FNVIOPGPIK**  
 dienoyl-CoA reductase [NADPH] (4-enoyl-CoA reductase [NADPH]).

7

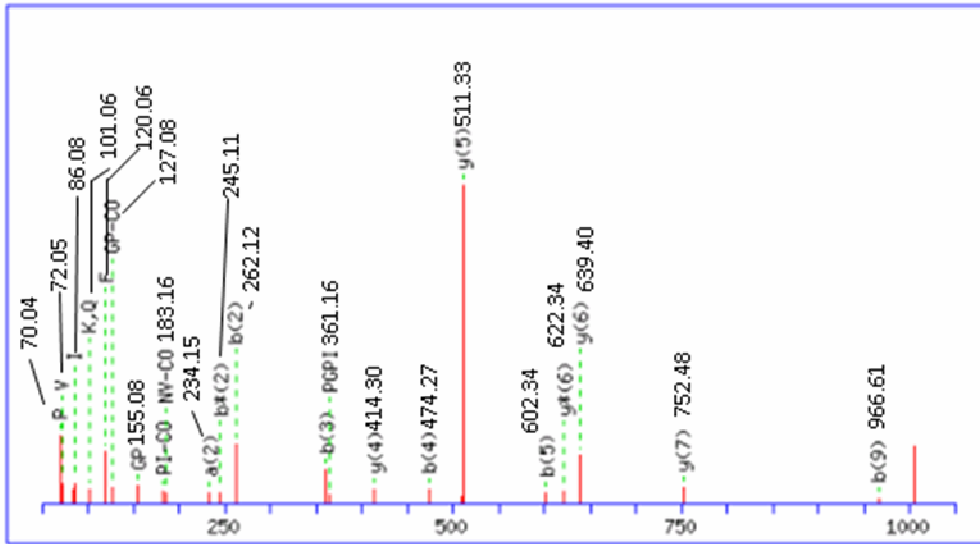

**Monoisotopic mass of neutral peptide Mr(calc): 1111.6390**

**Fixed modifications:** Carbamidomethyl (C)

**Ions Score:** 47 **Expect:** 0.0021

**Matches (Bold Red):** 28/114 fragment ions using 24 most intense peaks

MS/MS Fragmentation of **NSSVGLIQLNRPK**  
 Enoyl-CoA hydratase, mitochondrial precursor (EC 4.2.1.17) (Short

T

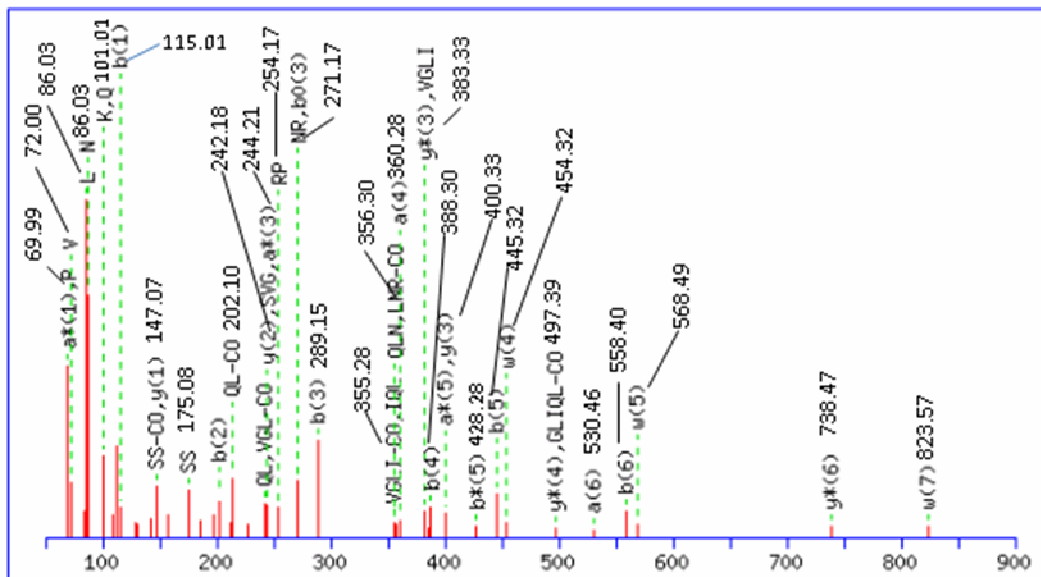

**Monoisotopic mass of neutral peptide Mr(calc):** 1424.8099

**Fixed modifications:** Carbamidomethyl (C)

**Ions Score:** 48 **Expect:** 0.0016

**Matches (Bold Red):** 49/210 fragment ions using 37 most intense peaks

MS/MS Fragmentation of **FIDTSQFILNR**

Putative mitochondrial import inner membrane translocase subunit Tim8

G

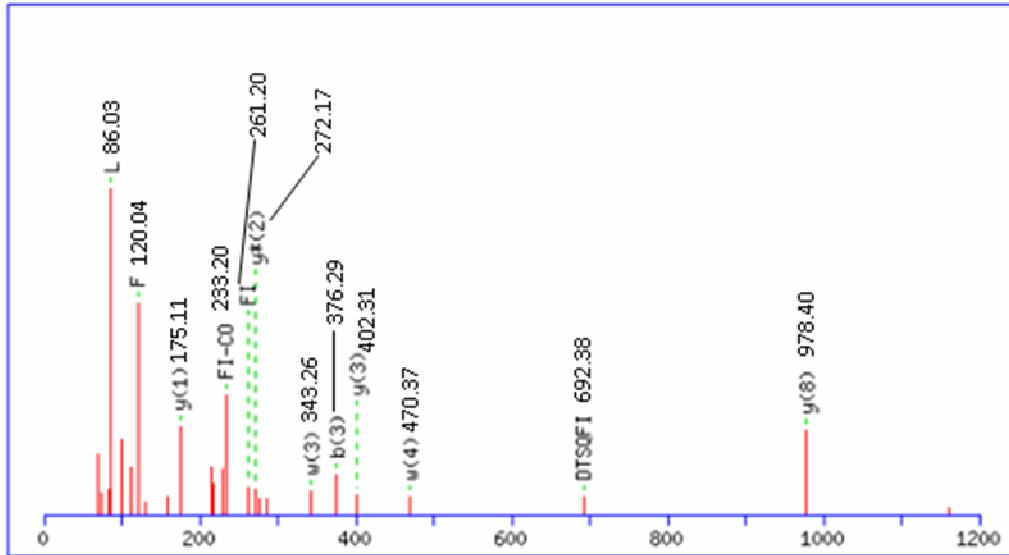

**Monoisotopic mass of neutral peptide Mr(calc):** 1352.7088

**Fixed modifications:** Carbamidomethyl (C)

**Ions Score:** 28 **Expect:** 0.16

**Matches (Bold Red):** 20/162 fragment ions using 13 most intense peaks
